# Supplementary material
Source: PubMed Central journal article supplement (PMC5105341)
Supplement: Supp_Data.pdf [file Supp_Data.pdf]

# Supplementary Data

## Supplementary Data 1

### Supplementary Experimental Procedures

#### *Human cord blood cell isolation*

Human umbilical cord blood (CB) was collected from the John Radcliffe Hospital, Oxford, United Kingdom, or the NHS Cord Blood Bank, London, United Kingdom, and used with informed consent and ethical approval from the South Central Oxford C and Berkshire Ethical Committees and approval of the NHSBT R&D committee. Mononuclear cells (MNCs) were isolated by density centrifugation on Ficoll-Histopaque (density <1.077 g/mL) and CD133<sup>+</sup> cells were enriched using direct microbead kits (Miltenyi Biotec, Bergisch-Gladbach, Germany) [1–3]. Cell number and viability were assessed using CountBright beads (ThermoFisher) and DAPI (Invitrogen Ltd.), respectively, as described [1,4]. CD133-enriched cells were incubated with FcR block and the relevant antibodies, viz, mouse (m) anti-human PE- or APC-CD133/2 (293C3) and APC- or PerCP-CD34 (AC136 or 8G12, respectively; all from Miltenyi Biotec) or relevant isotype controls (PE- or APC-mIgG2b-PE, APC- or PerCP-mIgG2a; Miltenyi Biotec, or APC- or PeCy5-mIgG2a or APC-mIgG1-APC; BD Biosciences) [1–3]. DAPI (1:50,000 dilution) was added as a viability stain before cells were analyzed on a BD LSR II flow cytometer using the BD FACSDiva 6 software program (both from BD Biosciences) or using FlowJo software (TreeStar, Inc.) as previously described [1–3]. Cell purity precryopreservation was on average 93% ± 3% (mean ± SD; *n* = 20 donors). The cells were cryopreserved in 10% DMSO in fetal calf serum (FCS) and stored at ≤−150°C until use.

#### *Thawing of cryopreserved cells for the CombiCult<sup>®</sup> screen*

Cells were thawed into media consisting of StemSpan SFEM, 10 ng/mL human recombinant thrombopoietin (TPO), 10 ng/mL heparin, 10 ng/mL human recombinant fibroblast growth factor 1 (FGF-1), 20 ng/mL human recombinant stem cell factor (SCF), 100 ng/mL human recombinant insulin growth factor-binding protein 2 (IGFBP2), and 500 ng/mL human recombinant angiopoietin-like 5 (ANGPTL5) (all from R&D Systems) and plated into 96-well round bottom suspension plates (Bibby Sterilin) at 20,000 cells/well in 150 µL of media above and incubated for 1–3 days at 37°C in a humidified incubator with 5% CO<sub>2</sub>.

#### *Selection of cytokine combinations for analysis and algorithm development for CombiCult screen design*

The experimental matrix comprised three split-pool cycles, with medium changes performed on days 1, 4, and 7. Ten conditions were tested in each cycle, resulting in an experimental complexity of 10 × 10 × 10, which equals 1,000 different combinations. StemSpan SFEM (Stem Cell Technologies), supplemented with 10 ng/mL TPO (R&D Systems), 20 ng/mL SCF (R&D Systems), and 10 ng/mL heparin (Sigma Aldrich Ltd.), was used throughout the entire experiment as basal media.

Medium components for each condition were selected using the following algorithm:

- (1) For a chosen number of components, generate all possible combinations of that size from the full set of components, that is, choose exactly *k* components from a total of *n*. The number of combinations is given by the binomial coefficient:

$${}^n C_k = \frac{n!}{k!(n-k)!}$$

- (2) Zero or more filters are specified and applied to each of the combinations. When the test performed by at least one of these filters satisfied, the combination is removed from the results. Each filter consists of a three-way check per component: PRESENT, MISSING, or EITHER. A test is satisfied when a generated combination matches all such checks.
- (3) The remaining combinations are sorted alphabetically by component and tabulated for subsequent analysis.

Thus, certain pairings of components known a priori to be undesirable can be excluded from the screening matrix. In a very general manner, other combinatorial tests can be performed.

In this instance, each condition comprised basal media containing two cytokines and supplemented with four additional cytokines or growth factors known to have stimulatory effects on CB HSC expansion. Initially, all combinations of four components were generated from the set:

{ ANGPTL5, DLL1, FGF-1, Flt3L, IGFBP2, OSM; all from R&D Systems}

Subsequently, these  ${}^7C_4 = 35$  combinations were filtered by removing any containing one or more of the following pairings, leaving an experimental matrix width of 10 conditions:

- FGF-1 + Flt3L
- FGF-1 + DLL1
- Flt3L + Wnt5a
- DLL1 + Wnt5a

An additional software analysis tool was implemented to analyze component commonality across two or more split-pool cycles. First, all possible pathways were generated through the split-pool matrix (for a matrix of width,  $w$ , and number of cycles,  $c$ , this amounts to a total of  $w^c$  possible pathways). Subsequently, a set-wise intersection of the components across all steps in each path was made such that a tally of common component groupings could be made over the entire screen. This operation permitted rapid analysis of the relative frequencies of different conditions given the chosen filtering.

In the first instance, the data were tabulated so that for each hit bead, the presence or absence of each component across all experimental stages is represented horizontally with a binary value. For a chosen number of clusters, the K-medoids algorithm selects cluster centers and then assigns beads to those clusters such that the total Euclidean distance between centers and cluster members is minimized over the entire dataset. Different initial (random) configurations can lead to different final clusterings, so multiple runs are typically performed to ensure optimality.

### Supplementary References

- Gullo F, M Van Der Garde, G Russo, M Pennisi, S Motta, F Pappalardo and S Watt (2015). Computational modeling of the expansion of human cord blood CD133+ hematopoietic stem/progenitor cells with different cytokine combinations. *Bioinformatics* 31:2514–2522.
- Pepperell EE and SM Watt (2013). A novel application for a 3-dimensional timelapse assay that distinguishes chemotactic from chemokinetic responses of hematopoietic CD133(+) stem/progenitor cells(). *Stem Cell Res* 11:707–720.
- Chang C-H, SJ Hale, CV Cox, A Blair, B Kronsteiner, R Grabowska, Y Zhang, D Cook, CP Khoo, et al. (2016). Junctional adhesion molecule-A is highly expressed on human hematopoietic repopulating cells and associates with the key hematopoietic chemokine receptor cxcr4. *Stem Cells* 34:1664–1678.
- van der Garde M, Y van Hensbergen, A Brand, MC Slot, A de Graaf-Dijkstra, A Mulder, SM Watt and JJ Zwaginga (2015). Thrombopoietin treatment of one graft in a double cord blood transplant provides early platelet recovery while contributing to long-term engraftment in NSG mice. *Stem Cells Dev* 24:67–76.

SUPPLEMENTARY TABLE S1. PROTOCOLS FOR VALIDATION

|                 | 1                                 | 2                                 | 3                                 | 4                                 | 5                                         | 6                                 | 7                                 | 8                             | 9                                  | 10                                | 11                                | 12                                | 13                       | 14                         | 15                         |       |
|-----------------|-----------------------------------|-----------------------------------|-----------------------------------|-----------------------------------|-------------------------------------------|-----------------------------------|-----------------------------------|-------------------------------|------------------------------------|-----------------------------------|-----------------------------------|-----------------------------------|--------------------------|----------------------------|----------------------------|-------|
| <i>Protocol</i> | 747                               | 379                               | 245                               | 776                               | 187                                       | 277                               | 74+                               | 3K                            | 4K1 (241)                          | 444                               | 777                               | P1                                | P2                       | Positive control           | Negative control           |       |
| Day 1           | ANGPTL5<br>IGFBP2<br>Flt3L<br>OSM | ANGPTL5<br>DLL<br>IGFBP2<br>OSM   | ANGPTL5<br>DLL<br>Flt3L<br>OSM    | ANGPTL5<br>IGFBP2<br>Flt3L<br>OSM | ANGPTL5<br>DLL1<br>Flt3L<br>IGFB2P<br>OSM | ANGPTL5<br>DLL1<br>Flt3L<br>OSM   | ANGPTL5<br>IGFBP2<br>Flt3L<br>OSM | Flt3L<br>DLL1<br>OSM<br>ANGL5 | Flt3L<br>DLL1<br>OSM               | Flt3L<br>OSM<br>ANGL5             | ANGPTL5<br>IGFBP2<br>Flt3L<br>OSM | ANGPTL5<br>IGFBP2<br>Flt3L<br>OSM | ANGPTL5<br>IGFBP2<br>OSM | ANGPTL5<br>OSM<br>FGF-1    | ANGPTL5<br>IGFBP2<br>FGF-1 | Basal |
| Day 4           | ANGPTL5<br>IGFBP2<br>FGF-1<br>OSM | ANGPTL5<br>IGFBP2<br>Flt3L<br>OSM | ANGPTL5<br>IGFBP2<br>FGF-1<br>OSM | ANGPTL5<br>IGFBP2<br>Flt3L<br>OSM | ANGPTL5<br>OSM<br>Wnt-5a<br>OSM           | ANGPTL5<br>IGFBP2<br>Flt3L<br>OSM | ANGPTL5<br>IGFBP2<br>Flt3L<br>OSM | FGF-1<br>ANGL5<br>ANGL5       | FGF-1<br>ANGL5<br>IGFBP2<br>OSM    | ANGPTL5<br>IGFBP2<br>FGF-1<br>OSM | ANGPTL5<br>IGFBP2<br>Flt3L<br>OSM | ANGPTL5<br>IGFBP2<br>OSM          | ANGPTL5<br>OSM<br>FGF-1  | ANGPTL5<br>IGFBP2<br>FGF-1 | ANGPTL5<br>IGFBP2<br>FGF-1 | Basal |
| Day 7           | ANGPTL5<br>IGFBP2<br>Flt3L<br>OSM | OSM<br>IGFBP2<br>DLL1<br>Flt3L    | OSM<br>IGFBP2<br>Wnt-5a<br>FGF-1  | ANGPTL5<br>OSM<br>Wnt-5a<br>FGF-1 | ANGPTL5<br>IGFBP2<br>Flt3L<br>OSM         | ANGPTL5<br>IGFBP2<br>Flt3L<br>OSM | ANGPTL5<br>IGFBP2<br>Flt3L<br>OSM | Flt3L<br>ANGPTL5<br>OSM       | Flt3L<br>IGFBP2<br>ANGPTL5<br>DLL1 | ANGPTL5<br>IGFBP2<br>FGF-1<br>OSM | ANGPTL5<br>IGFBP2<br>Flt3L<br>OSM | ANGPTL5<br>IGFBP2<br>OSM          | ANGPTL5<br>OSM<br>FGF-1  | ANGPTL5<br>IGFBP2<br>FGF-1 | ANGPTL5<br>IGFBP2<br>FGF-1 | Basal |

Basal media: StemSpan SFEM, 20 ng/mL SCF, 10 ng/mL TPO, and 1-ng/mL heparin.

SUPPLEMENTARY TABLE S2. MEDIA COMPONENTS USED FOR EACH OF 3 STAGES OF EXPANSION FOR PROTOCOL VALIDATION

| <i>Protocol</i> | <i>747</i>                        | <i>7+4</i>                                 | <i>379</i>                        | <i>3+7+9</i>                              |
|-----------------|-----------------------------------|--------------------------------------------|-----------------------------------|-------------------------------------------|
| Day 1           | ANGPTL5<br>IGFBP2<br>Flt3L<br>OSM | ANGPTL5<br>IGFBP2<br>Flt3L<br>OSM<br>FGF-1 | ANGPTL5<br>IGFBP2<br>OSM<br>DLL1  | ANGPTL5<br>IGFBP2<br>Flt3L<br>OSM<br>DLL1 |
| Day 4           | ANGPTL5<br>IGFBP2<br>FGF-1<br>OSM | ANGPTL5<br>IGFBP2<br>Flt3L<br>OSM<br>FGF-1 | ANGPTL5<br>IGFBP2<br>Flt3L<br>OSM | ANGPTL5<br>IGFBP2<br>Flt3L<br>OSM<br>DLL1 |
| Day 7           | ANGPTL5<br>IGFBP2<br>Flt3L<br>OSM | ANGPTL5<br>IGFBP2<br>Flt3L<br>OSM<br>FGF-1 | IGFBP2<br>Flt3L<br>OSM<br>DLL1    | ANGPTL5<br>IGFBP2<br>Flt3L<br>OSM<br>DLL1 |

SUPPLEMENTARY TABLE S3. SCHEMA FOR CYTOKINE ADDITION ON DAYS 0, 2, AND 5 TO SCAFFOLD-BASED CULTURES

| <i>Protocol and day of medium change</i> | <i>Cytokine (ng/mL)</i> |            |              |              |            |                |               |             |              |
|------------------------------------------|-------------------------|------------|--------------|--------------|------------|----------------|---------------|-------------|--------------|
|                                          | <i>SCF</i>              | <i>TPO</i> | <i>FLT3L</i> | <i>FGF-1</i> | <i>OSM</i> | <i>ANGPTL5</i> | <i>IGFBP2</i> | <i>DLL1</i> | <i>Wnt5A</i> |
| 379                                      |                         |            |              |              |            |                |               |             |              |
| Day 0                                    | 20                      | 10         | 0            | 0            | 50         | 500            | 100           | 50          | 0            |
| Day 2                                    | 20                      | 10         | 100          | 0            | 50         | 500            | 100           | 0           | 0            |
| Day 5                                    | 20                      | 10         | 100          | 10           | 50         | 0              | 100           | 50          | 0            |
| 747                                      |                         |            |              |              |            |                |               |             |              |
| Day 0                                    | 20                      | 10         | 100          | 0            | 50         | 500            | 100           | 0           | 0            |
| Day 2                                    | 20                      | 10         | 0            | 10           | 50         | 500            | 100           | 0           | 0            |
| Day 5                                    | 20                      | 10         | 100          | 0            | 50         | 500            | 100           | 0           | 0            |
| 245                                      |                         |            |              |              |            |                |               |             |              |
| Day 0                                    | 20                      | 10         | 100          | 0            | 50         | 500            | 0             | 50          | 0            |
| Day 2                                    | 20                      | 10         | 0            | 10           | 50         | 500            | 100           | 0           | 0            |
| Day 5                                    | 20                      | 10         | 0            | 10           | 0          | 500            | 100           | 0           | 500          |
| 241                                      |                         |            |              |              |            |                |               |             |              |
| Day 0                                    | 20                      | 10         | 100          | 0            | 50         | 500            | 0             | 50          | 0            |
| Day 2                                    | 20                      | 10         | 0            | 10           | 50         | 500            | 100           | 0           | 0            |
| Day 5                                    | 20                      | 10         | 100          | 0            | 0          | 500            | 100           | 50          | 0            |
| Basal                                    |                         |            |              |              |            |                |               |             |              |
| Day 0                                    | 20                      | 10         | 0            | 0            | 0          | 0              | 0             | 0           | 0            |
| Day 2                                    | 20                      | 10         | 0            | 0            | 0          | 0              | 0             | 0           | 0            |
| Day 5                                    | 20                      | 10         | 0            | 0            | 0          | 0              | 0             | 0           | 0            |

Combinations of cytokines added at days 0, 2, and 5 to basal media comprising SCF and TPO in StemSpan ACF serum-free media. Readout at day 8.

## Supplementary Data 2

### MIFlowCyt Configuration File for Scaffold-Expanded Cells

#### Experimental overview

##### 1. Purpose

The purpose of the experiment was the analysis of the fold expansion of CB CD133<sup>+</sup>CD34<sup>+</sup> and hematopoietic stem and progenitor cell (HSPC) subsets cultured with different cytokine combinations by performing quantitative flow cytometry experiments of 3D nanofiber scaffold cultured cells. This method was capable of determining the importance of sequential exposure of cells to different cytokine signaling inputs. To test the benefits of this method in our 3D scaffold culture, we included our previous observation that the addition of SCF and TPO served as an important starting point in our formulation

of an optimal cocktail for CB HSPC expansion [1]. In the experiments presented here, we chose four formulations from the CombiCult screen for validation and compared this with the basal control, which contained SCF and TPO only. Importantly, we aimed to discover if combinations of factors added at different times throughout the culture period were more powerful at promoting the proliferation of the CB CD133<sup>+</sup>CD34<sup>+</sup> cells and of the HSC, MMP, CLP, CMP, GMP, and MEP HSPC subsets in ex vivo culture based on phenotypic markers ahead of future in vivo studies in surrogate models.

## 2. Keywords

Expansion, hematopoietic stem and progenitor cells, cytokines, 3D scaffold, HSPC subsets.

## 3. Experimental variables

- Fold expansion of total nucleated cells (TNCs)

The fold expansion of TNCs was calculated by dividing the number of viable cells after culture (day 8) by the number of cells before culture (day 0). The average was calculated for three to five CB donors for each cytokine combination.

- Fold expansion of Lin<sup>-</sup>CD133<sup>+</sup>CD34<sup>+</sup> cells

The fold expansion of Lin<sup>-</sup>CD133<sup>+</sup>CD34<sup>+</sup> was calculated by multiplying the fold expansion of TNCs with the percentage of viable Lin<sup>-</sup>CD133<sup>+</sup>CD34<sup>+</sup> cells, which was determined by flow cytometry.

- Fold expansion of HSPC subsets

Cell subsets were defined as single viable cells based on FSC and SSC and DAPI negativity (Fig. 4A). Subsets were then defined as HSC (Lin<sup>-</sup>CD34<sup>+</sup>CD38<sup>dim</sup>CD45RA<sup>-</sup>CD90<sup>+</sup>), MPP (Lin<sup>-</sup>CD34<sup>+</sup>CD38<sup>dim</sup>CD45RA<sup>-</sup>CD90<sup>-</sup>), CLP (Lin<sup>-</sup>CD34<sup>+</sup>CD38<sup>dim</sup>CD45RA<sup>+</sup>CD90<sup>-</sup>), CMP (Lin<sup>-</sup>CD34<sup>+</sup>CD38<sup>+</sup>CD45RA<sup>-</sup>CD123<sup>+</sup>), GMP (Lin<sup>-</sup>CD34<sup>+</sup>CD38<sup>+</sup>CD45RA<sup>+</sup>CD123<sup>+</sup>), and MEP (Lin<sup>-</sup>CD34<sup>+</sup>CD38<sup>+</sup>CD45RA<sup>-</sup>CD123<sup>-</sup>). Fold expansion was calculated as described above. The antibodies used are defined below in Supplementary Table S4.

SUPPLEMENTARY TABLE S4. ANTIBODIES USED FOR FLOW CYTOMETRY

| Name    | Clone    | Isotype | Fluorochrome | Company     | Catalogue number | Typical dilution used and/or final conc. (µg/mL)                      |
|---------|----------|---------|--------------|-------------|------------------|-----------------------------------------------------------------------|
| CD34    | 581      | mIgG1   | AF700        | BD          | 561440           | 1:60                                                                  |
| CD38    | HIT2     | mIgG1   | PE TxR       | Caltag      | MHCD3817         | 1:40                                                                  |
| CD45RA  | HI100    | mIgG2bk | APC-H7       | BD          | 560674           | 1:50                                                                  |
| CD90    | 5E10     | IgG1    | PE           | Biologend   | 328109           | 1:50 or 1:25<br>0.5 µg/mL                                             |
| CD49f   | GoH3     | rIgG2a  | PE-Cy7       | Biologend   | 313622           | 1:120<br>0.8 µg/mL                                                    |
| CD133   | 293C3    | IgG2b   | APC          | Miltenyi    | 130-090-854      | 1:30                                                                  |
| CD123   | 6H6      | mIgG1   | PerCp-Cy5.5  | Biologend   | 306016           | 1:50 or 1:100                                                         |
| CD2     | RPA-2.10 | mIgG1   | PE-Cy5       | Biologend   | 300210           | 1:150<br>0.16 µg/mL                                                   |
| CD3     | HIT3a    | mIgG2a  | PE-Cy5       | Biologend   | 300310           | 1:200<br>0.1 µg/mL                                                    |
| CD4     | RPA-T4   | mIgG1   | PE-Cy5       | Biologend   | 300510           | 1:150<br>0.6 µg/mL                                                    |
| CD7     | CD7-6B7  | mIgG1   | PE-Cy5       | Biologend   | 343110           | 1:150<br>0.08 µg/mL                                                   |
| CD8a    | RPA-T8   | mIgG1   | PE-Cy5       | Biologend   | 301010           | 1:200<br>0.125 µg/mL                                                  |
| CD10    | HI10a    | mIgG1   | PE-Cy5       | Biologend   | 312206           | 1:80<br>0.625 µg/mL                                                   |
| CD11b   | ICRF44   | mIgG1   | PE-Cy5       | Biologend   | 301308           | 1:80<br>0.625 µg/mL                                                   |
| CD14    | 6103     | mIgG2a  | PE-Cy5       | eBioscience | 15-0149-42       | 1:80                                                                  |
| CD19    | HIB19    | mIgG1   | PE-Cy5       | Biologend   | 302209           | 1:200<br>0.125 µg/mL                                                  |
| CD20    | 2H7      | mIgG2a  | PE-Cy5       | Biologend   | 302307           | 1:150<br>0.13 µg/mL                                                   |
| CD56    | B159     | mIgG1   | PE-Cy5       | BD          | 555517           | 1:20                                                                  |
| CD235ab | HIR2     | mIgG2b  | PE-Cy5       | Biologend   | 306606           | 1:1200<br>0.16 µg/mL                                                  |
| CD133   | 293C3    | mIgG2b  | PE           | Miltenyi    | 130-090-853      | 1:22 for assessing purity of cells after CD133 selection<br>0.1 µg/mL |
| DAPI    |          |         | UV 440/40    |             |                  |                                                                       |

#### 4. Organization

Name: Stem Cell Research, Nuffield Division of Clinical Laboratory Sciences, Radcliffe Department of Medicine, University of Oxford, and NHS Blood and Transplant Oxford

Address: John Radcliffe Hospital, Oxford, OX3 9DU, United Kingdom

Contacts:

Name 1: Suzanne Watt

Email 1: [suzanne.watt@nhsbt.nhs.uk](mailto:suzanne.watt@nhsbt.nhs.uk)

Name 2: Peng Hua

Email 2: [peng.hua@ndcls.ox.ac.uk](mailto:peng.hua@ndcls.ox.ac.uk)

Name 3: Barbara Kronsteiner

Email 3: [barbara.kronsteiner-dobramysl@ndm.ox.ac.uk](mailto:barbara.kronsteiner-dobramysl@ndm.ox.ac.uk)

Date:

Experiments were performed between March 2013 and December 2015.

Conclusions:

The fold expansion depended on the number of cytokines and their combination in the experiments presented here.

#### 5. Quality control measures

The performance of the flow cytometer was analyzed daily by running Cytometer Setup and Tracking beads (Life Technologies) according to the manufacturer's recommendations. Appropriate isotype controls for the initial CD133<sup>+</sup> cell purity assessment and FMOs were used to assess the level of background staining of the antibodies and to adjust compensation and set gates.

#### *Sample/specimen material description*

##### 1. Biological samples

Biological sample description:

70–150 mL of umbilical cord blood (CB) was collected in the John Radcliffe or specified London Hospitals (UCH, Barnett, Watford General, St George's or Northwick Park hospitals) with written consent from the mother and ethical permission and stored at room temperature (20°C–22°C) for up to 24 h until processing.

Biological Sample Source Description:

*Homo Sapiens*

Biological Sample Source Organism Description:

*Taxonomy: Homo Sapiens*

*Age:* Blood was drawn from the placenta and umbilical cord from newborn babies over 38 weeks of gestation

*Gender:* Unknown

*Phenotype:* Not applicable

*Genotype:* Not applicable

*Treatment:* Mononuclear cells (MNCs) were isolated from cord blood (CB) by density gradient separation. CD133<sup>+</sup> cells were isolated from the MNCs using MACS magnetic bead separation. Cells were frozen in 10% DMSO with 90% FCS at –150°C until use.

##### 2. Sample characteristics

On days 0 and 8, cells were analyzed for HSC and HPC subset markers (see list attached and Supplementary Table S3 above).

##### 3. Sample treatment description

- Before expansion: CD133<sup>+</sup> cells were isolated using MACS-CD133 beads (Miltenyi Biotec) and assayed for CD133 purity using CD133-PE or CD133-APC antibodies described above (Supplementary Table S3) and DAPI for viability and then cryopreserved. At day –1, cells were thawed by diluting the cell suspension 5× by dropwise addition of warm media (37°C). Cells were rested at RT for 20 min, then washed by centrifugation, and resuspended in StemSpan ACF serum-free expansion medium.
- Cells were precultured for 18–24 h in basal medium comprising StemSpan ACF serum-free medium containing SCF and TPO in 96-well plates at 20,000 cells/well.
- After preculture: Cells were harvested, counted using CountBright beads by flow cytometry, and plated at 2,500 cells/well on 3D scaffold-coated 24-well plates. Cells were cultured in StemSpan ACF serum-free medium supplemented with SCF and TPO and different combinations of cytokines (Supplementary Table S3).
- After expansion: Cells were harvested from the plate and counted using CountBright beads to obtain TNC counts after 8 days of expansion and phenotyping was performed by flow cytometry.
- TNC Quantification: CountBright Absolute counting beads (Molecular Probes) were added to 200 µL of cell suspension (either undiluted or diluted depending on the expected concentration). When quantifying the cells directly after culture (without centrifugation), 200 µL of the harvested cell suspension was added to a 5-mL Falcon tube together with 20 µL of CountBright beads. Just before flow cytometry, 2 µL of DAPI (10 µg/mL) was added to the tube. When quantifying the cells in one sample together with the surface markers, 10 µL of CountBright beads was added with DAPI as above.

- Multicolor flow cytometry staining: Cells were stained in 5-mL Falcon tubes or 96-well V bottom plates depending on the number of samples to be processed. Fc-receptors were blocked with Miltenyi human FcR blocking reagent (1:10 diluted in MACS buffer, 25–100  $\mu$ L) and cells were incubated for 10 min at 4°C. Antibodies were either added directly to the cell suspension (25  $\mu$ L cells +25  $\mu$ L Ab 2 $\times$ ) or alternatively the cells were centrifuged and resuspended in antibody solution (50–100  $\mu$ L). Final antibody dilutions or concentrations are as indicated in Table S4. Cells were incubated for 30 min and then washed with 1 mL MACS buffer if using 5-mL Falcon tubes or 100  $\mu$ L MACS buffer if using 96-well plates. After centrifugation at 1,500 rpm for 4.5 min, the supernatant was removed and the cells re-suspended in 200  $\mu$ L MACS buffer. Just before flow cytometry, 2  $\mu$ L of DAPI (10  $\mu$ g/mL) was added to the cells.

#### 4. Multiparameter flow cytometry for HSPC subsets:

##### Fluorescence Reagent Description

Subset markers are described above and in Supplementary Table S4 and their staining is illustrated in Fig. 4, and lasers and detectors are described below.

##### Compensation:

Compensation was performed using BD CompBeads (cat no 552843; BD Biosciences), using single stains for antibodies and one unstained sample as well as FMO controls.

#### Instrument details

##### 1. Instrument manufacturer and model

BD Biosciences, BD LSR II Flow Cytometer.

##### 2. Instrument configurations and settings (Supplementary Tables S5–S7)

##### 3. Flow cells and fluidics

The instrument has not been altered.

##### 4. Light sources

SUPPLEMENTARY TABLE S5. LIGHT SOURCES

| Lasers | Type              | Wavelength | Power (mW) |
|--------|-------------------|------------|------------|
| Blue   | Coherent Sapphire | 488        | 20         |
| Red    | JDS Uniphase      | 633        | 17         |
| UV     | Lightwave Xcyte   | 355        | 20         |

#### 5. Excitation

The instrument has not been altered.

##### Optical Paths and Filters

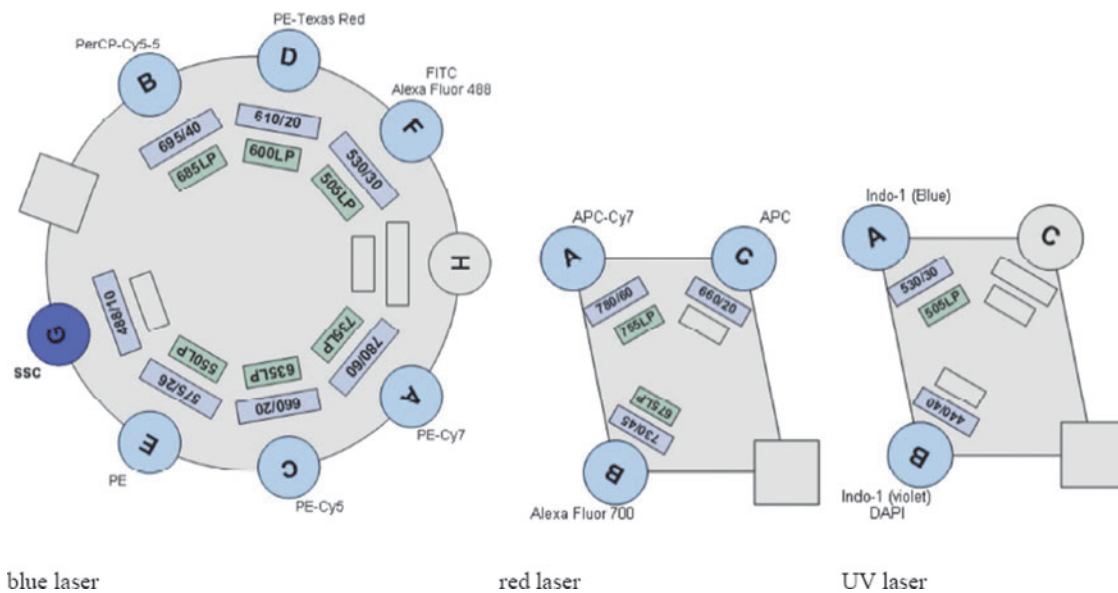

SUPPLEMENTARY TABLE S6. FLOW CYTOMETER DETAILS

| <i>Detector array</i>     | <i>PMT</i> | <i>LP mirror</i> | <i>BP filter</i> | <i>Intended dye</i> |
|---------------------------|------------|------------------|------------------|---------------------|
| Octagon, blue laser 488nm | A          | 735              | 780/60           | PE-Cy7              |
|                           | B          | 685              | 695/40           | PerCP-Cy5.5         |
|                           | C          | 635              | 660/20           | Pe-Cy5              |
|                           | D          | 600              | 610/20           | PE-Texas Red        |
|                           | E          | 550              | 575/26           | PE                  |
|                           | F          | 505              | 530/30           | FITC                |
|                           | G          | —                | 488/10           | SSC                 |
| Trigon, red laser 633nm   | A          | 755              | 780/60           | APC-Cy7             |
|                           | B          | 675              | 730/45           | Alexa Fluor 700     |
|                           | C          | —                | 660/20           | APC                 |
| Trigon, UV laser 355nm    | A          | 505              | 530/30           | Indo-1 (blue)       |
|                           | B          | —                | 440/40           | DAPI                |

SUPPLEMENTARY TABLE S7. DETECTOR VOLTAGES

| <i>Cytometer parameters</i> | <i>Fluorophore</i> | <i>Voltage</i> |
|-----------------------------|--------------------|----------------|
| FSC-A                       |                    | 340            |
| FSC-H                       |                    | 340            |
| FSC-W                       |                    | 340            |
| SSC-A                       |                    | 300            |
| SSC-H                       |                    | 300            |
| SSC-W                       |                    | 300            |
| PE-A                        | PE                 | 586            |
| PE-Texas Red-A              | PE-Texas Red       | 625            |
| PE-Cy5-A                    | PE-Cy5             | 700            |
| PerCP-Cy5-5-A               | PerCP-Cy5-5        | 680            |
| PE-Cy7-A                    | PE-Cy7             | 827            |
| Indo-1 (violet)-A           | Indo-1 (violet)    | 350            |
| APC-A                       | APC                | 646            |
| Alexa Fluor 700-A           | Alexa Fluor 700    | 597            |
| APC-Cy7-A                   | APC-Cy7            | 551            |

*Data analysis details*

1. List-mode data files

FSC files can be obtained by contacting Prof. S.M.W. after this work has been published.

2. Compensation

The compensation matrix as shown in Supplementary Table S8 was exported from FlowJoV10.0.6.

SUPPLEMENTARY TABLE S8. COMPENSATION FOR MULTIPARAMETER ANALYSES

| <i>Compensation LSRII</i> | <i>PE</i> | <i>PE-Texas Red</i> | <i>PE-Cy5</i> | <i>PerCP-Cy5-5</i> | <i>PE-Cy7</i> | <i>APC</i> | <i>Alexa Fluor 700</i> | <i>APC-Cy7</i> |
|---------------------------|-----------|---------------------|---------------|--------------------|---------------|------------|------------------------|----------------|
| PE                        | 100       | 30.06825            | 28.62304      | 12.52708           | 1.888783      | 0          | 0.459494               | 0.08047        |
| PE-Texas Red              | 13.8167   | 100                 | 113.7357      | 57.85912           | 12.35224      | 0          | 0.666783               | 0.670753       |
| PE-Cy5                    | 1.2061    | 0.438597            | 100           | 47.9836            | 12.7516       | 0          | 0.1321                 | 12.0677        |
| PerCP-Cy5-5               | 0.2061    | 0.082454            | 30.7141       | 100                | 33.4804       | 0.1348     | 0                      | 2.7106         |
| PE-Cy7                    | 0.8399    | 0.222049            | 0.251         | 0.1844             | 100           | 0.1316     | 0.178                  | 1.5782         |
| APC                       | 0         | 1                   | 0             | 0                  | 0             | 100        | 11.138                 | 3.3749         |
| Alexa Fluor 700           | 0         | 0                   | 0             | 0                  | 3.4776        | 1.4718     | 100                    | 22.867         |
| APC-Cy7                   | 0         | 0                   | 3.0198        | 0.3169             | 4.2881        | 5.6092     | 5.4635                 | 100            |

*Data transformation details*

1. Data transformation description

FlowJo version 10.0.6 has been used for visualization of the data.

FSC and SCC were displayed with linear scales, all fluorescence parameters were displayed with logarithmic parameters.

Number of decades to display linear converted data: 3

Number of decades to display log converted data: 5

2. Relevant transformation details

FlowJo version 10.0.6 running on Windows 7 was used for transforming the data.

### *Gating details*

1. Gate description

The gating strategy involved the following gates:

- FSC/SSC gate to define cells
- FSC/SSC gate to define CountBright beads
- DAPI/SSC gate to define viable cells
- Gating for cell surface markers as in Fig. 4.

2. Gate statistics

Data can be obtained from FCS files.

3. Gate boundaries

- Those for cell number quantitation through CountBright beads and viability staining are shown in Supplementary Fig. S1.
- Those for multiparameter analyses are shown in Fig. 4A.

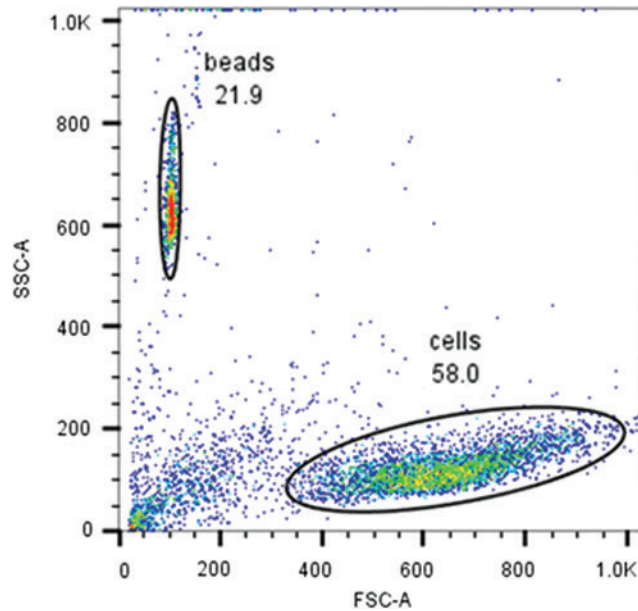

**SUPPLEMENTARY FIG. S1.** FSC/SSC gate to define cells and CounBright beads for cell quantitation.
